# Supplementary material for: An improved ASM-GDA approach to evaluate the production kinetics of loosely bound and tightly bound extracellular polymeric substances in biological phosphorus removal process
Source: Royal Society of Chemistry journal article supplement (doi:10.1039/c9ra06845g), 2020-01-01
Supplement: c9ra06845g1.pdf [file c9ra06845g1.pdf]

## Supplementary Material

### An improved ASM-GDA approach to evaluate the production kinetics of loosely bound and tightly bound extracellular polymeric substances in biological phosphorus removal process

Hai Cui,<sup>a</sup> Shan-Shan Yang,<sup>\*a</sup> Ji-Wei Pang,<sup>a</sup> Hai-Rong Mi,<sup>b</sup> Chen-Chen Nuer<sup>b</sup> and Jie Ding<sup>a</sup>

*a. State Key Laboratory of Urban Water Resource and Environment, Harbin Institute of Technology, Harbin 150000, PR China. E-mail: shanshanyang@hit.edu.cn*

*b. College of Aerospace and Civil Engineering, Harbin Engineering University, Harbin 150001, PR China*

#### 1. Sensitive analysis

According to previous studies [1], the normalised sensitivity coefficient ( $\delta_{ij}$ ) is defined as a ratio of the percentage change in the output variable ( $y_i$ ) to a 10% change in the input variable ( $x_j$ ). Through sensitive analysis, a small variation in the value of a parameter ( $x_j$ ) with high sensitivity will cause a large variation in the response predicted by the model. In this study, a 50% increase in the input variable is applied for the purpose of  $\delta_{ij}$  calculation. Through analyzing the effects of the model parameters on the extended ASM2 model outputs ( $S_{PO4}$ ,  $X_{TB-EPS}$ ,  $X_{LB-EPS}$ , and  $X_{PP}$ ), the coefficient  $\delta_{ij}$  of the individual parameter is calculated by Eq. (S1).

$$\delta_{ij} = \frac{x_j \Delta y_i}{y_i \Delta x_j} \quad (S1)$$

where the vector  $y_i$  ( $i = 1, 2, \dots, n$ ) represents the model output variables; the vector  $x_j$  ( $j = 1, 2, \dots, n$ ) represents the independent model parameters.

For each input variable, the influence of a model parameter on the model output can be interpreted as follows:  $\delta_{ij} < 0.5$  represents that the model parameter has no significant influence on the model output;  $\delta_{ij} > 0.5$  represents that the model parameter is influential and needs calibration.

#### References

- 1 E. Liwarska-Bizukojc, R. Biernacki, Identification of the most sensitive parameters in the activated sludge model implemented in BioWin software, *Bioresour. Technol.*, 2010, **101**, 7278-7285.
- 2 Lapidou, C.S., Rittmann, B.E., Non-steady state modeling of extracellular polymeric substances, soluble microbial products, and active and inert biomass. *Water Res.* 2002, **36 (8)**, 1983-1992.
- 3 Ni, B.J., Fang, F., Rittmann, B.E., Yu, H.QI., Modeling Microbial Products in Activated Sludge under Feast-Famine Conditions. *Environ. Sci. Technol.*, 2009, **43**, 2489-2497.
- 4 Jiang, T., Myngheer, S., Pauw, D.J.D., Spanjers, H., Nopens, I., Kennedy, M.D., Amy, G., Vanrolleghem, P. A., Modelling the production and degradation of soluble microbial products (SMP) in membrane bioreactors (MBR). *Water Res.*, 2008, **42 (20)**, 4955-4964.

**Table S1** Kinetic rates expressions in the extended ASM2 model

|    | Process                                  | $\rho_i$                                                                                                                                                                                                                                                              |
|----|------------------------------------------|-----------------------------------------------------------------------------------------------------------------------------------------------------------------------------------------------------------------------------------------------------------------------|
| 1  | Aerobic growth of $X_H$ on $S_S$         | $\mu_H \frac{S_{O_2}}{K_{O_2} + S_{O_2}} \cdot \frac{S_S}{K_S + S_S} \cdot \frac{S_{PO_4}}{K_{PO_4} + S_{PO_4}} \cdot \frac{S_{NH_4}}{K_{NH_4} + S_{NH_4}} \cdot \frac{S_{ALK}}{K_{ALK} + S_{ALK}} \cdot X_H$                                                         |
| 2  | Aerobic growth of $X_H$ on $S_{EPS}$     | $\mu_{S_{EPS}} \frac{S_{O_2}}{K_{O_2} + S_{O_2}} \cdot \frac{S_{EPS}}{K_{EPS} + S_{EPS}} \cdot \frac{S_{PO_4}}{K_{PO_4} + S_{PO_4}} \cdot \frac{S_{NH_4}}{K_{NH_4} + S_{NH_4}} \cdot \frac{S_{ALK}}{K_{ALK} + S_{ALK}} \cdot X_H$                                     |
| 3  | Formation of $S_{EPS}$ from $X_{TB-EPS}$ | $k_{h,TB-EPS} \cdot \frac{S_S}{K_{S,S_{EPS}} + S_S} \cdot X_{TB-EPS}$                                                                                                                                                                                                 |
| 4  | Formation of $S_{EPS}$ from $X_{LB-EPS}$ | $k_{h,LB-EPS} \cdot \frac{S_S}{K_{S,S_{EPS}} + S_S} \cdot X_{LB-EPS}$                                                                                                                                                                                                 |
| 5  | Storage of $X_{PHA}$                     | $q_{PHA} \frac{S_S}{K_S + S_S} \cdot \frac{S_{ALK}}{K_{ALK} + S_{ALK}} \cdot \frac{X_{PP}/X_{PAO}}{K_{PP} + X_{PP}/X_{PAO}} \cdot X_{PAO}$                                                                                                                            |
| 6  | Storage of $X_{PP}$                      | $q_{PP} \cdot \frac{S_{O_2}}{K_{O_2} + S_{O_2}} \cdot \frac{S_{PO_4}}{K_{PO_4} + S_{PO_4}} \cdot \frac{S_{ALK}}{K_{ALK} + S_{ALK}} \cdot \frac{X_{PHA}/X_{PAO}}{K_{PHA} + X_{PHA}/X_{PAO}} \cdot \frac{K_{max} - X_{PP}/X_{PAO}}{K_{IPP} + K_{max} - X_{PP}/X_{PAO}}$ |
| 7  | Decomposing of $X_{PHA}$                 | $b_{PHA} \cdot X_{PHA} \frac{S_{ALK}}{K_{ALK} + S_{ALK}}$                                                                                                                                                                                                             |
| 8  | Decomposing of $X_{PP}$                  | $b_{PP} \cdot X_{PP} \frac{S_{ALK}}{K_{ALK} + S_{ALK}}$                                                                                                                                                                                                               |
| 9  | Aerobic growth of $X_{PAO}$              | $\mu_{PAO} \frac{S_{O_2}}{K_{O_2} + S_{O_2}} \cdot \frac{S_{PO_4}}{K_{PO_4} + S_{PO_4}} \cdot \frac{S_{NH_4}}{K_{NH_4} + S_{NH_4}} \cdot \frac{S_{ALK}}{K_{ALK} + S_{ALK}} \cdot \frac{X_{PHA}/X_{PAO}}{K_{PHA} + X_{PHA}/X_{PAO}} \cdot X_{PAO}$                     |
| 10 | Lysis of $X_H$                           | $b_H \cdot X_H$                                                                                                                                                                                                                                                       |
| 11 | Lysis of $X_{PAO}$                       | $b_{PAO} \cdot X_{PAO} \frac{S_{ALK}}{K_{ALK} + S_{ALK}}$                                                                                                                                                                                                             |

**Table S2** Stoichiometric and kinetic model parameters for the extended ASM2 model

| Parameters         | Description                                                             | Value  | Unit                        | References    |
|--------------------|-------------------------------------------------------------------------|--------|-----------------------------|---------------|
| $Y_H$              | Heterotrophic yield coefficient                                         | 0.625  | $g\ COD/g\ COD$             | ASM2          |
| $Y_{PAO}$          | PAOs yield coefficient                                                  | 0.625  | $g\ COD/g\ COD$             | ASM2          |
| $Y_{H,S_{EPS}}$    | Yield coefficient for growth on $S_{EPS}$                               | 0.625  | $g\ COD_x/g\ COD_{S_{EPS}}$ | [2,3]         |
| $Y_{PHA}$          | PHA requirement for storage of phosphate in the form of $X_{PP}$        | 0.20   | $g\ COD/g\ COD$             | ASM2          |
| $Y_{PO_4}$         | PP requirement for storage of $X_{PHA}$                                 | 0.40   | $g\ P/g\ COD$               | ASM2          |
| $\mu_H$            | Maximum growth rate of heterotroph                                      | 6.00   | $d^{-1}$                    | ASM2          |
| $\mu_{PAO}$        | Maximum growth rate of PAO                                              | 1.00   | $d^{-1}$                    | ASM2          |
| $\mu_{S_{EPS}}$    | Maximum rate of $S_{EPS}$ degradation                                   | 0.0029 | $h^{-1}$                    | [2,3]         |
| $b_H$              | Decay rate of heterotroph                                               | 0.40   | $d^{-1}$                    | ASM2          |
| $b_{PAO}$          | Decay rate of PAO                                                       | 0.20   | $d^{-1}$                    | ASM2          |
| $b_{PP}$           | Decomposition rate constants of $X_{PP}$                                | 0.20   | $d^{-1}$                    | ASM2          |
| $b_{PHA}$          | Decomposition rate constants of $X_{PHA}$                               | 0.20   | $d^{-1}$                    | ASM2          |
| $q_{PP}$           | Rate constants of PP storage                                            | 1.50   | $d^{-1}$                    | ASM2          |
| $q_{PHA}$          | Rate constants of PHA storage                                           | 3.00   | $d^{-1}$                    | ASM2          |
| $k_{TB-EPS}$       | TB-EPS formation coefficient                                            | 0.18   | $g\ COD_{TB-EPS}/g\ C\ell$  | [2,3]         |
| $k_{LB-EPS}$       | LB-EPS formation coefficient                                            | 0.18   | $g\ COD_{LB-EPS}/g\ C\ell$  | [2,3]         |
| $K_{O_2}$          | Dissolve oxygen affinity constant                                       | 0.20   | $g\ O_2/m^3$                | ASM2          |
| $K_S$              | $S_i$ affinity constant for heterotroph                                 | 4.00   | $g\ COD/m^3$                | ASM2          |
| $K_{PO_4}$         | Affinity constant for heterotroph                                       | 0.01   | $g\ P/m^3$                  | ASM2          |
| $K_{ALK}$          | Alkalinity affinity constant for heterotroph                            | 0.10   | $mol(HCO_3^-)/m^3$          | ASM2          |
| $\alpha_{S_{EPS}}$ | Affinity constant for $S_{EPS}$ formation                               | 0.02   | $g\ COD_{S_{EPS}}/m$        | [2,3]         |
| $\alpha_{S_{EPS}}$ | Biomass affinity constant for $S_{EPS}$                                 | 85     | $g\ COD_{S_{EPS}}/m$        | [2,3]         |
| $i_{P,BM}$         | P contents in $X_H, X_{PAO}, X_{TB-EPS}, X_{LB-EPS}$                    | 0.02   | $g\ P/g\ COD$               | ASM2, [4]     |
| $k_{h,TB-EPS}$     | TB-EPS hydrolysis rate constant                                         | 0.228  | $d^{-1}$                    | [2,3]         |
| $k_{h,LB-EPS}$     | LB-EPS hydrolysis rate constant                                         | 0.4    | $d^{-1}$                    | Extended ASM2 |
| $f_{PP,TB-EPS}$    | $X_{TB-EPS}$ fraction during $X_{PP}$ storage and decomposing processes | 0.09   | $g\ S_{PO_4}/g\ X_{TB-EPS}$ | Extended ASM2 |
| $f_{PP,LB-EPS}$    | $X_{LB-EPS}$ fraction during $X_{PP}$ storage and decomposing processes | 0.04   | $g\ S_{PO_4}/g\ X_{LB-EPS}$ | Extended ASM2 |

**Table S3** Stoichiometric matrix for the extended ASM2 model

| Process |                                          | $S_O$                                        | $S_S$            | $S_{PO_4}$                                        | $S_{NH_4}$ | $S_{ALK}$ | $S_{EPS}$                  | $X_{TB-EPS}$             | $X_{LB-EPS}$     | $X_H$ | $X_I$ | $X_S$ | $X_{PAO}$ | $X_{PP}$            | $X_{PHA}$  |
|---------|------------------------------------------|----------------------------------------------|------------------|---------------------------------------------------|------------|-----------|----------------------------|--------------------------|------------------|-------|-------|-------|-----------|---------------------|------------|
| 1       | Aerobic growth of $X_H$ on $S_S$         | $-\frac{[1 - k_{TB-EPS} - k_{LB-EPS}]}{Y_H}$ | $-\frac{1}{Y_H}$ | $-[i_{P,X_{TB-EPS}} \cdot \frac{k_{TB-EF}}{Y_H}]$ |            |           | $\frac{k_{TB-EPS}}{Y_H}$   | $\frac{k_{LB-EPS}}{Y_H}$ | $1 - k_{TB-EPS}$ |       |       |       |           |                     |            |
| 2       | Aerobic growth of $X_H$ on $S_{EPS}$     | $-\frac{1 - Y_{H,S_{EPS}}}{Y_{H,S_{EPS}}}$   |                  | $v_{2,PO_4}$                                      |            |           | $-\frac{1}{Y_{H,S_{EPS}}}$ |                          |                  | 1     |       |       |           |                     |            |
| 3       | Formation of $S_{EPS}$ from $X_{TB-EPS}$ |                                              |                  | $v_{3,PO_4}$                                      |            |           | 1                          | -1                       |                  |       |       |       |           |                     |            |
| 4       | Formation of $S_{EPS}$ from $X_{LB-EPS}$ |                                              |                  | $v_{4,PO_4}$                                      |            |           | 1                          |                          | -1               |       |       |       |           |                     |            |
| 5       | Storage of $X_{PHA}$                     |                                              | -1               | $Y_{PO_4}$                                        |            |           |                            |                          |                  |       |       |       |           | $-Y_{PO_4}$         | 1          |
| 6       | Storage of $X_{PP}$                      | $-Y_{PHA}$                                   |                  | -1                                                |            |           |                            | $f_{PP,TB-EPS}$          | $f_{PP,LB-EPS}$  |       |       |       |           | $1 - f_{PP,TB-EPS}$ | $-Y_{PHA}$ |
| 7       | Decomposition of $X_{PHA}$               |                                              | 1                |                                                   |            |           |                            |                          |                  |       |       |       |           |                     | -1         |
| 8       | Decomposition of $X_{PP}$                |                                              |                  | $1 - f_{PP,TB-EPS} - f_{PP,L}$                    |            |           |                            | $f_{PP,TB-EPS}$          | $f_{PP,LB-EPS}$  |       |       |       |           | -1                  |            |

|        |                             |                         |               |  |    |           |                             |                      |
|--------|-----------------------------|-------------------------|---------------|--|----|-----------|-----------------------------|----------------------|
| 9      | Aerobic growth of $X_{PAO}$ | $1 - \frac{1}{Y_{PAO}}$ | $-i_{P,BM}$   |  |    |           | 1                           | $-\frac{1}{Y_{PAO}}$ |
| 1<br>0 | Lysis of $X_H$              |                         | $v_{10,PO_4}$ |  | -1 | $f_{X_I}$ | $\frac{1-f_{X_I}}{f_{X_I}}$ |                      |
| 1<br>1 | Lysis of $X_{PAO}$          |                         | $v_{11,PO_4}$ |  |    | $f_{X_I}$ | $\frac{1-f_{X_I}}{f_{X_I}}$ | -1                   |

---
